# Supplementary material for: Dynamic ligation at the first amine-coordinated iron hydrogenase active site mimic
Source: Royal Society of Chemistry journal article supplement (doi:10.1039/b608260b), 2006-01-01
Supplement: b608260b.pdf [file b608260b.pdf]

## Electronic Supplementary Information

### Dynamic ligation at the first amine-coordinated iron hydrogenase active site mimic

Lennart Schwartz<sup>[a]</sup>, Jesper Ekström<sup>[b]</sup>, Reiner Lomoth\*<sup>[a]</sup> and Sascha Ott\*<sup>[a]</sup>

<sup>[a]</sup> Department of Photochemistry and Molecular Science, Uppsala University, Box 523, 75120 Uppsala, Sweden; Fax: +46 (0)18 4716844; E-mail: reiner.lomoth@fotomol.uu.se, sascha.ott@fotomol.uu.se.

<sup>[b]</sup> Department of Organic Chemistry, Arrhenius Laboratory, Stockholm University, 10691 Stockholm, Sweden

#### X-ray analysis of 1:

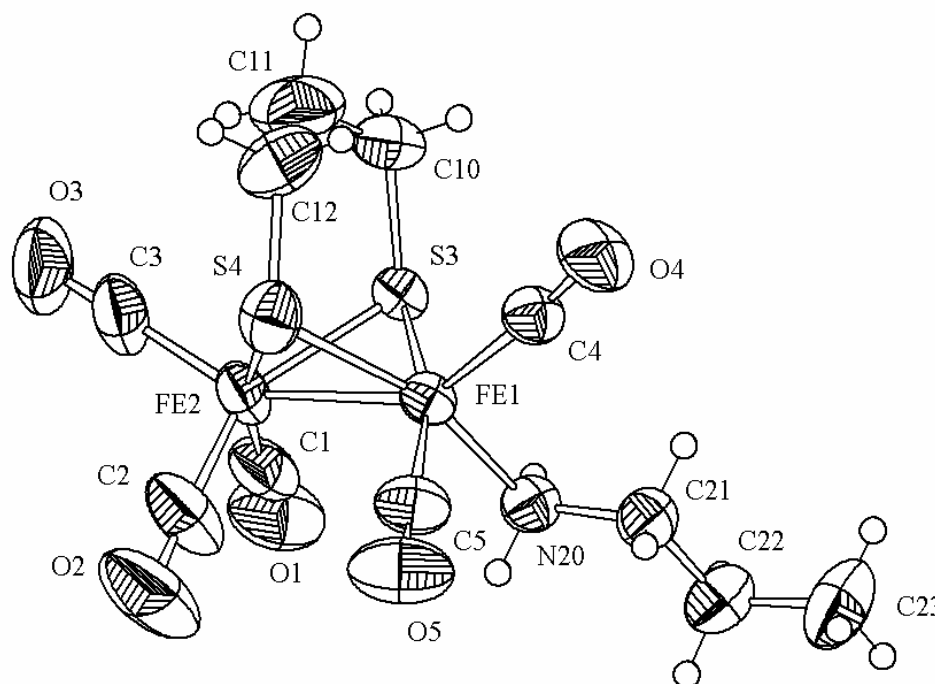

Displacement ellipsoids draw at 50% probability level. Hydrogen atoms shown as small circles draw with arbitrary radii.

Single crystal X-ray diffraction data was recorded with an Oxford Diffraction Excalibur diffractometer equipped with a Sapphire-III CCD detector, using Mo-radiation source

( $\lambda = 0.71073 \text{ \AA}$ ). Data processing by the diffractometer software [1]. The structure was solved by conventional direct methods using SHELXS97 [2] giving electron density maps where most of the non-hydrogen atoms could be resolved. The rest of the non-hydrogen atoms were located from difference electron density maps and the structure model was refined with full matrix least square calculations on  $F^2$  using the program SHELXL97-2 [3]. All non-hydrogen atoms were refined with anisotropic displacement parameters and the hydrogen's, which were placed at geometrically calculated positions and let to ride on the atoms they were bonded to, were given isotropic displacement parameters calculated as  $\xi \cdot U_{\text{eq}}$  for the non-hydrogen atoms with  $\xi = 1.5$  for methyl hydrogen's ( $-\text{CH}_3$ ) and  $\xi = 1.2$  for methylenic ( $-\text{CH}_2-$ ) hydrogen's. The picture is made with the program Diamond [4].

Selected crystal data are given in Table 1.

## References

- 1) Oxford diffraction, CrysAlis Pro, version 1.71.229.9
- 2) Sheldrick, G.M. (1990). Acta Cryst. A46, 467-473
- 3) Sheldrick, G.M. (1997). Computer program for the refinement of crystal structures, Göttingen, Germany
- 4) DIAMOND - Visual Crystal Structure Information System, CRYSTAL IMPACT, Postfach 1251, D-53002 Bonn, Germany

**Table 1.** Selected crystal data for **1**.

|                                             |                                                                            |
|---------------------------------------------|----------------------------------------------------------------------------|
| code                                        | Ls95                                                                       |
| Empirical formula                           | $\text{C}_{11} \text{H}_{15} \text{Fe}_2 \text{N}_5 \text{O}_5 \text{S}_2$ |
| Temperature, K                              | 293(2)                                                                     |
| Fw                                          | 417.06                                                                     |
| Crystal system                              | Monoclinic                                                                 |
| Space group                                 | $P 2_1/a$                                                                  |
| A, $\text{Å}$                               | 11.279(1)                                                                  |
| B, $\text{Å}$                               | 13.631(1)                                                                  |
| C, $\text{Å}$                               | 12.135(1)                                                                  |
| $\alpha$ , $^\circ$                         | 90                                                                         |
| $\beta$ , $^\circ$                          | 113.86(1)                                                                  |
| $\gamma$ , $^\circ$                         | 90                                                                         |
| V, $\text{Å}^3$                             | 1706.4(3)                                                                  |
| Z                                           | 4                                                                          |
| $\rho_{\text{calc}}$ , $\text{g cm}^{-3}$   | 1.623                                                                      |
| $\mu$ (MoK $\alpha$ ), ( $\text{mm}^{-1}$ ) | 1.960                                                                      |

Supplementary Material (ESI) for Chemical Communications  
This journal is (c) The Royal Society of Chemistry 2006

|                                                             |                     |
|-------------------------------------------------------------|---------------------|
| N(meas), N(uniq), R(int)                                    | 28673, 5528, 0.0619 |
| N(obs), N(par), S (GoF)                                     | 3597, 190, 1.06     |
| R1, wR2 both with ( $I > 2\sigma(I)$ )                      | 0.0493, 0.1320      |
| R1, wR2 (all data)                                          | 0.0776, 0.1455      |
| $\Delta\rho_{\min}, \Delta\rho_{\max}$ ( $e/\text{\AA}^3$ ) | -0.635 – 0.781      |

Supplementary Material (ESI) for Chemical Communications  
This journal is (c) The Royal Society of Chemistry 2006

**Complete cif file output from SHELXL97**

```
data_r

_audit_creation_method          SHELXL-97
_chemical_name_systematic
;
?
;
_chemical_name_common           ?
_chemical_melting_point         ?
_chemical_formula_moiety        ?
_chemical_formula_sum           'C11 H15 Fe2 N O5 S2'
_chemical_formula_weight        417.06

loop_
_atom_type_symbol
_atom_type_description
_atom_type_scatter_dispersion_real
_atom_type_scatter_dispersion_imag
_atom_type_scatter_source
'C' 'C' 0.0033 0.0016
'International Tables Vol C Tables 4.2.6.8 and 6.1.1.4'
'H' 'H' 0.0000 0.0000
'International Tables Vol C Tables 4.2.6.8 and 6.1.1.4'
'Fe' 'Fe' 0.3463 0.8444
'International Tables Vol C Tables 4.2.6.8 and 6.1.1.4'
'N' 'N' 0.0061 0.0033
'International Tables Vol C Tables 4.2.6.8 and 6.1.1.4'
'O' 'O' 0.0106 0.0060
'International Tables Vol C Tables 4.2.6.8 and 6.1.1.4'
'S' 'S' 0.1246 0.1234
'International Tables Vol C Tables 4.2.6.8 and 6.1.1.4'

_symmetry_cell_setting          ?
_symmetry_space_group_name_H-M ?

loop_
_symmetry_equiv_pos_as_xyz
'x, y, z'
'-x+1/2, y+1/2, -z'
'-x, -y, -z'
'x-1/2, -y-1/2, z'

_cell_length_a                  11.2794(12)
_cell_length_b                  13.6313(14)
_cell_length_c                  12.1349(13)
_cell_angle_alpha               90.0
_cell_angle_beta                113.856(10)
_cell_angle_gamma               90.0
_cell_volume                    1706.4(3)
_cell_formula_units_Z           4
_cell_measurement_temperature   293(2)
_cell_measurement_reflns_used   ?
_cell_measurement_theta_min     ?
```

Supplementary Material (ESI) for Chemical Communications  
This journal is (c) The Royal Society of Chemistry 2006

```
_cell_measurement_theta_max      ?

_exptl_crystal_description        ?
_exptl_crystal_colour            ?
_exptl_crystal_size_max          ?
_exptl_crystal_size_mid          ?
_exptl_crystal_size_min          ?
_exptl_crystal_density_meas      ?
_exptl_crystal_density_diffn     1.623
_exptl_crystal_density_method    'not measured'
_exptl_crystal_F_000             848
_exptl_absorpt_coefficient_mu     1.960
_exptl_absorpt_correction_type   ?
_exptl_absorpt_correction_T_min  ?
_exptl_absorpt_correction_T_max  ?
_exptl_absorpt_process_details   ?

_exptl_special_details
;
?
;

_diffn_ambient_temperature        293(2)
_diffn_radiation_wavelength       0.71073
_diffn_radiation_type             MoK\alpha
_diffn_radiation_source           'fine-focus sealed tube'
_diffn_radiation_monochromator    graphite
_diffn_measurement_device_type    ?
_diffn_measurement_method        ?
_diffn_detector_area_resol_mean   ?
_diffn_standards_number           ?
_diffn_standards_interval_count   ?
_diffn_standards_interval_time    ?
_diffn_standards_decay_%         ?
_diffn_reflns_number              28673
_diffn_reflns_av_R_equivalents    0.0619
_diffn_reflns_av_sigmaI/netI     0.0431
_diffn_reflns_limit_h_min         -16
_diffn_reflns_limit_h_max         17
_diffn_reflns_limit_k_min         -20
_diffn_reflns_limit_k_max         20
_diffn_reflns_limit_l_min         -9
_diffn_reflns_limit_l_max         17
_diffn_reflns_theta_min           3.92
_diffn_reflns_theta_max           33.07
_reflns_number_total              5528
_reflns_number_gt                  3597
_reflns_threshold_expression       >2sigma(I)

_computing_data_collection        ?
_computing_cell_refinement        ?
_computing_data_reduction         ?
_computing_structure_solution     'SHELXS-97 (Sheldrick, 1990)'
_computing_structure_refinement   'SHELXL-97 (Sheldrick, 1997)'
_computing_molecular_graphics     ?
_computing_publication_material   ?
```

Supplementary Material (ESI) for Chemical Communications  
This journal is (c) The Royal Society of Chemistry 2006

```
_refine_special_details
;
  Refinement of F2 against ALL reflections. The weighted R-factor wR
  and
  goodness of fit S are based on F2, conventional R-factors R are
  based
  on F, with F set to zero for negative F2. The threshold expression
  of
  F2 > 2sigma(F2) is used only for calculating R-factors(gt) etc.
  and is
  not relevant to the choice of reflections for refinement. R-factors
  based
  on F2 are statistically about twice as large as those based on F,
  and R-
  factors based on ALL data will be even larger.
;

_refine_ls_structure_factor_coef  Fsqd
_refine_ls_matrix_type            full
_refine_ls_weighting_scheme       calc
_refine_ls_weighting_details
'calc w=1/[\s2(Fo2)+(0.0797P)2+0.0000P] where
P=(Fo2+2Fc2)/3'
_atom_sites_solution_primary      direct
_atom_sites_solution_secondary    difmap
_atom_sites_solution_hydrogens    geom
_refine_ls_hydrogen_treatment     mixed
_refine_ls_extinction_method      none
_refine_ls_extinction_coef        ?
_refine_ls_number_reflns         5528
_refine_ls_number_parameters      190
_refine_ls_number_restraints      0
_refine_ls_R_factor_all           0.0776
_refine_ls_R_factor_gt            0.0493
_refine_ls_wR_factor_ref          0.1455
_refine_ls_wR_factor_gt          0.1320
_refine_ls_goodness_of_fit_ref    1.063
_refine_ls_restrained_S_all       1.063
_refine_ls_shift/su_max           0.001
_refine_ls_shift/su_mean          0.000

loop_
  _atom_site_label
  _atom_site_type_symbol
  _atom_site_fract_x
  _atom_site_fract_y
  _atom_site_fract_z
  _atom_site_U_iso_or_equiv
  _atom_site_adp_type
  _atom_site_occupancy
  _atom_site_symmetry_multiplicity
  _atom_site_calc_flag
  _atom_site_refinement_flags
  _atom_site_disorder_assembly
  _atom_site_disorder_group
Fe1 Fe 0.70129(3) 0.59770(2) 0.37941(3) 0.04079(13) Uani 1 1 d . . .
Fe2 Fe 0.71936(4) 0.47007(3) 0.23311(4) 0.05338(15) Uani 1 1 d . . .
```

Supplementary Material (ESI) for Chemical Communications  
This journal is (c) The Royal Society of Chemistry 2006

S3 S 0.87994(5) 0.57308(4) 0.34454(6) 0.04182(16) Uani 1 1 d . . .  
S4 S 0.59902(7) 0.60954(6) 0.17966(7) 0.0626(2) Uani 1 1 d . . .  
C10 C 0.9077(3) 0.6725(2) 0.2563(3) 0.0638(8) Uani 1 1 d . . .  
H10A H 0.9206 0.7326 0.3026 0.077 Uiso 1 1 calc R . .  
H10B H 0.9880 0.6588 0.2478 0.077 Uiso 1 1 calc R . .  
C11 C 0.8082(5) 0.6903(4) 0.1372(4) 0.1102(17) Uani 1 1 d . . .  
H11A H 0.8110 0.6361 0.0863 0.132 Uiso 1 1 calc R . .  
H11B H 0.8336 0.7486 0.1066 0.132 Uiso 1 1 calc R . .  
C12 C 0.6729(4) 0.7031(3) 0.1183(4) 0.0848(11) Uani 1 1 d . . .  
H12A H 0.6217 0.7069 0.0322 0.102 Uiso 1 1 calc R . .  
H12B H 0.6655 0.7659 0.1527 0.102 Uiso 1 1 calc R . .  
C1 C 0.8203(3) 0.3720(2) 0.3192(4) 0.0674(9) Uani 1 1 d . . .  
O1 O 0.8880(3) 0.30993(19) 0.3729(3) 0.0996(9) Uani 1 1 d . . .  
C2 C 0.5747(3) 0.4068(3) 0.2162(5) 0.0907(14) Uani 1 1 d . . .  
O2 O 0.4840(3) 0.3652(3) 0.2092(4) 0.1379(15) Uani 1 1 d . . .  
C3 C 0.7371(3) 0.4422(3) 0.0947(4) 0.0766(10) Uani 1 1 d . . .  
O3 O 0.7492(3) 0.4230(3) 0.0079(3) 0.1112(11) Uani 1 1 d . . .  
C4 C 0.7247(3) 0.72290(19) 0.4224(3) 0.0513(6) Uani 1 1 d . . .  
O4 O 0.7396(3) 0.80468(15) 0.4420(3) 0.0820(7) Uani 1 1 d . . .  
C5 C 0.5471(3) 0.5795(2) 0.3865(3) 0.0611(8) Uani 1 1 d . . .  
O5 O 0.4475(2) 0.5696(2) 0.3880(3) 0.0984(10) Uani 1 1 d . . .  
N20 N 0.7960(2) 0.53395(15) 0.5466(2) 0.0485(5) Uani 1 1 d . . .  
H20A H 0.7540 0.4782 0.5482 0.058 Uiso 1 1 calc R . .  
H20B H 0.8762 0.5172 0.5545 0.058 Uiso 1 1 calc R . .  
C21 C 0.8082(3) 0.5935(2) 0.6519(3) 0.0560(7) Uani 1 1 d . . .  
H21A H 0.7221 0.6133 0.6425 0.067 Uiso 1 1 calc R . .  
H21B H 0.8562 0.6526 0.6521 0.067 Uiso 1 1 calc R . .  
C22 C 0.8742(3) 0.5442(3) 0.7729(3) 0.0674(8) Uani 1 1 d . . .  
H22A H 0.8239 0.4873 0.7760 0.081 Uiso 1 1 calc R . .  
H22B H 0.9593 0.5216 0.7822 0.081 Uiso 1 1 calc R . .  
C23 C 0.8884(5) 0.6128(4) 0.8756(4) 0.0985(14) Uani 1 1 d . . .  
H23A H 0.9298 0.5789 0.9507 0.148 Uiso 1 1 calc R . .  
H23B H 0.8043 0.6348 0.8671 0.148 Uiso 1 1 calc R . .  
H23C H 0.9402 0.6683 0.8741 0.148 Uiso 1 1 calc R . .

loop\_  
\_atom\_site\_aniso\_label  
\_atom\_site\_aniso\_U\_11  
\_atom\_site\_aniso\_U\_22  
\_atom\_site\_aniso\_U\_33  
\_atom\_site\_aniso\_U\_23  
\_atom\_site\_aniso\_U\_13  
\_atom\_site\_aniso\_U\_12  
Fe1 0.04012(18) 0.03378(18) 0.0494(2) 0.00081(14) 0.01911(15)  
0.00347(12)  
Fe2 0.0514(2) 0.0461(2) 0.0641(3) -0.01775(18) 0.02493(19) -0.01105(15)  
S3 0.0388(3) 0.0373(3) 0.0498(4) -0.0011(2) 0.0184(2) -0.0007(2)  
S4 0.0461(3) 0.0775(5) 0.0527(4) 0.0000(4) 0.0081(3) 0.0066(3)  
C10 0.0686(17) 0.0514(15) 0.085(2) 0.0069(15) 0.0444(17) -0.0044(13)  
C11 0.111(3) 0.115(4) 0.094(3) 0.048(3) 0.030(3) -0.017(3)  
C12 0.090(2) 0.095(3) 0.066(2) 0.035(2) 0.0281(18) 0.023(2)  
C1 0.0743(18) 0.0419(14) 0.097(3) -0.0131(16) 0.0455(19) -0.0103(14)  
O1 0.118(2) 0.0509(13) 0.147(3) 0.0153(16) 0.071(2) 0.0137(14)  
C2 0.0670(19) 0.070(2) 0.139(4) -0.037(2) 0.046(2) -0.0245(17)  
O2 0.098(2) 0.114(2) 0.218(4) -0.044(3) 0.081(3) -0.0563(19)  
C3 0.0698(19) 0.082(2) 0.080(2) -0.040(2) 0.0319(18) -0.0183(16)  
O3 0.121(2) 0.133(3) 0.090(2) -0.0582(19) 0.0523(19) -0.0250(19)

Supplementary Material (ESI) for Chemical Communications  
This journal is (c) The Royal Society of Chemistry 2006

C4 0.0568(13) 0.0415(13) 0.0593(17) 0.0020(12) 0.0273(12) 0.0046(10)  
O4 0.1099(18) 0.0370(10) 0.1059(19) -0.0067(12) 0.0506(15) 0.0023(11)  
C5 0.0577(15) 0.0495(14) 0.081(2) 0.0139(14) 0.0334(15) 0.0082(12)  
O5 0.0625(14) 0.106(2) 0.148(3) 0.0347(19) 0.0633(16) 0.0082(13)  
N20 0.0571(11) 0.0388(10) 0.0536(13) 0.0022(9) 0.0265(10) 0.0063(8)  
C21 0.0676(16) 0.0468(14) 0.0561(16) -0.0001(12) 0.0277(14) 0.0052(12)  
C22 0.0727(19) 0.077(2) 0.0560(18) 0.0106(16) 0.0289(16) 0.0132(15)  
C23 0.127(4) 0.114(4) 0.059(2) -0.005(2) 0.043(2) 0.021(3)

\_geom\_special\_details

;

All esds (except the esd in the dihedral angle between two l.s. planes)

are estimated using the full covariance matrix. The cell esds are taken

into account individually in the estimation of esds in distances, angles

and torsion angles; correlations between esds in cell parameters are only

used when they are defined by crystal symmetry. An approximate (isotropic)

treatment of cell esds is used for estimating esds involving l.s. planes.

;

loop\_

\_geom\_bond\_atom\_site\_label\_1

\_geom\_bond\_atom\_site\_label\_2

\_geom\_bond\_distance

\_geom\_bond\_site\_symmetry\_2

\_geom\_bond\_publ\_flag

Fe1 C4 1.771(3) . ?

Fe1 C5 1.793(3) . ?

Fe1 N20 2.067(2) . ?

Fe1 S4 2.2301(9) . ?

Fe1 S3 2.2453(7) . ?

Fe1 Fe2 2.5480(6) . ?

Fe2 C2 1.781(3) . ?

Fe2 C1 1.795(4) . ?

Fe2 C3 1.809(4) . ?

Fe2 S3 2.2550(7) . ?

Fe2 S4 2.2750(9) . ?

S3 C10 1.833(3) . ?

S4 C12 1.839(4) . ?

C10 C11 1.449(6) . ?

C10 H10A 0.9700 . ?

C10 H10B 0.9700 . ?

C11 C12 1.458(6) . ?

C11 H11A 0.9700 . ?

C11 H11B 0.9700 . ?

C12 H12A 0.9700 . ?

C12 H12B 0.9700 . ?

C1 O1 1.151(4) . ?

C2 O2 1.143(4) . ?

C3 O3 1.144(4) . ?

C4 O4 1.137(3) . ?

C5 O5 1.140(4) . ?



Supplementary Material (ESI) for Chemical Communications  
This journal is (c) The Royal Society of Chemistry 2006

N20 C21 1.470(4) . ?  
N20 H20A 0.9000 . ?  
N20 H20B 0.9000 . ?  
C21 C22 1.512(4) . ?  
C21 H21A 0.9700 . ?  
C21 H21B 0.9700 . ?  
C22 C23 1.511(5) . ?  
C22 H22A 0.9700 . ?  
C22 H22B 0.9700 . ?  
C23 H23A 0.9600 . ?  
C23 H23B 0.9600 . ?  
C23 H23C 0.9600 . ?

loop\_

\_geom\_angle\_atom\_site\_label\_1  
\_geom\_angle\_atom\_site\_label\_2  
\_geom\_angle\_atom\_site\_label\_3  
\_geom\_angle  
\_geom\_angle\_site\_symmetry\_1  
\_geom\_angle\_site\_symmetry\_3  
\_geom\_angle\_publ\_flag  
C4 Fe1 C5 98.67(14) . . ?  
C4 Fe1 N20 99.35(11) . . ?  
C5 Fe1 N20 91.19(12) . . ?  
C4 Fe1 S4 101.35(10) . . ?  
C5 Fe1 S4 88.70(11) . . ?  
N20 Fe1 S4 159.07(7) . . ?  
C4 Fe1 S3 99.26(10) . . ?  
C5 Fe1 S3 161.87(11) . . ?  
N20 Fe1 S3 88.55(7) . . ?  
S4 Fe1 S3 85.16(3) . . ?  
C4 Fe1 Fe2 144.67(10) . . ?  
C5 Fe1 Fe2 106.98(11) . . ?  
N20 Fe1 Fe2 103.90(6) . . ?  
S4 Fe1 Fe2 56.40(3) . . ?  
S3 Fe1 Fe2 55.69(2) . . ?  
C2 Fe2 C1 92.42(17) . . ?  
C2 Fe2 C3 103.47(19) . . ?  
C1 Fe2 C3 95.92(18) . . ?  
C2 Fe2 S3 147.67(16) . . ?  
C1 Fe2 S3 87.01(10) . . ?  
C3 Fe2 S3 108.75(11) . . ?  
C2 Fe2 S4 87.62(13) . . ?  
C1 Fe2 S4 162.90(12) . . ?  
C3 Fe2 S4 100.70(14) . . ?  
S3 Fe2 S4 83.90(3) . . ?  
C2 Fe2 Fe1 94.68(14) . . ?  
C1 Fe2 Fe1 108.28(12) . . ?  
C3 Fe2 Fe1 149.05(13) . . ?  
S3 Fe2 Fe1 55.34(2) . . ?  
S4 Fe2 Fe1 54.73(2) . . ?  
C10 S3 Fe1 112.21(10) . . ?  
C10 S3 Fe2 113.26(11) . . ?  
Fe1 S3 Fe2 68.97(2) . . ?  
C12 S4 Fe1 111.89(13) . . ?  
C12 S4 Fe2 112.38(14) . . ?  
Fe1 S4 Fe2 68.88(3) . . ?

Supplementary Material (ESI) for Chemical Communications  
This journal is (c) The Royal Society of Chemistry 2006

C11 C10 S3 117.6(3) . . ?  
C11 C10 H10A 107.9 . . ?  
S3 C10 H10A 107.9 . . ?  
C11 C10 H10B 107.9 . . ?  
S3 C10 H10B 107.9 . . ?  
H10A C10 H10B 107.2 . . ?  
C10 C11 C12 121.1(4) . . ?  
C10 C11 H11A 107.0 . . ?  
C12 C11 H11A 107.0 . . ?  
C10 C11 H11B 107.0 . . ?  
C12 C11 H11B 107.0 . . ?  
H11A C11 H11B 106.8 . . ?  
C11 C12 S4 118.0(3) . . ?  
C11 C12 H12A 107.8 . . ?  
S4 C12 H12A 107.8 . . ?  
C11 C12 H12B 107.8 . . ?  
S4 C12 H12B 107.8 . . ?  
H12A C12 H12B 107.2 . . ?  
O1 C1 Fe2 177.8(3) . . ?  
O2 C2 Fe2 177.7(5) . . ?  
O3 C3 Fe2 178.8(4) . . ?  
O4 C4 Fe1 175.1(3) . . ?  
O5 C5 Fe1 178.0(3) . . ?  
C21 N20 Fe1 116.71(16) . . ?  
C21 N20 H20A 108.1 . . ?  
Fe1 N20 H20A 108.1 . . ?  
C21 N20 H20B 108.1 . . ?  
Fe1 N20 H20B 108.1 . . ?  
H20A N20 H20B 107.3 . . ?  
N20 C21 C22 115.7(2) . . ?  
N20 C21 H21A 108.3 . . ?  
C22 C21 H21A 108.3 . . ?  
N20 C21 H21B 108.3 . . ?  
C22 C21 H21B 108.3 . . ?  
H21A C21 H21B 107.4 . . ?  
C23 C22 C21 111.8(3) . . ?  
C23 C22 H22A 109.3 . . ?  
C21 C22 H22A 109.3 . . ?  
C23 C22 H22B 109.3 . . ?  
C21 C22 H22B 109.3 . . ?  
H22A C22 H22B 107.9 . . ?  
C22 C23 H23A 109.5 . . ?  
C22 C23 H23B 109.5 . . ?  
H23A C23 H23B 109.5 . . ?  
C22 C23 H23C 109.5 . . ?  
H23A C23 H23C 109.5 . . ?  
H23B C23 H23C 109.5 . . ?

loop\_  
\_geom\_torsion\_atom\_site\_label\_1  
\_geom\_torsion\_atom\_site\_label\_2  
\_geom\_torsion\_atom\_site\_label\_3  
\_geom\_torsion\_atom\_site\_label\_4  
\_geom\_torsion  
\_geom\_torsion\_site\_symmetry\_1  
\_geom\_torsion\_site\_symmetry\_2  
\_geom\_torsion\_site\_symmetry\_3

Supplementary Material (ESI) for Chemical Communications  
This journal is (c) The Royal Society of Chemistry 2006

```
_geom_torsion_site_symmetry_4
_geom_torsion_publ_flag
C4 Fe1 Fe2 C2 -141.8(2) . . . . ?
C5 Fe1 Fe2 C2 -7.12(18) . . . . ?
N20 Fe1 Fe2 C2 88.50(18) . . . . ?
S4 Fe1 Fe2 C2 -83.74(16) . . . . ?
S3 Fe1 Fe2 C2 166.94(16) . . . . ?
C4 Fe1 Fe2 C1 124.08(18) . . . . ?
C5 Fe1 Fe2 C1 -101.23(15) . . . . ?
N20 Fe1 Fe2 C1 -5.61(13) . . . . ?
S4 Fe1 Fe2 C1 -177.85(11) . . . . ?
S3 Fe1 Fe2 C1 72.83(11) . . . . ?
C4 Fe1 Fe2 C3 -15.6(3) . . . . ?
C5 Fe1 Fe2 C3 119.1(2) . . . . ?
N20 Fe1 Fe2 C3 -145.3(2) . . . . ?
S4 Fe1 Fe2 C3 42.5(2) . . . . ?
S3 Fe1 Fe2 C3 -66.8(2) . . . . ?
C4 Fe1 Fe2 S3 51.25(15) . . . . ?
C5 Fe1 Fe2 S3 -174.06(10) . . . . ?
N20 Fe1 Fe2 S3 -78.44(7) . . . . ?
S4 Fe1 Fe2 S3 109.32(4) . . . . ?
C4 Fe1 Fe2 S4 -58.07(15) . . . . ?
C5 Fe1 Fe2 S4 76.62(10) . . . . ?
N20 Fe1 Fe2 S4 172.24(7) . . . . ?
S3 Fe1 Fe2 S4 -109.32(4) . . . . ?
C4 Fe1 S3 C10 -45.35(16) . . . . ?
C5 Fe1 S3 C10 126.0(4) . . . . ?
N20 Fe1 S3 C10 -144.59(14) . . . . ?
S4 Fe1 S3 C10 55.39(13) . . . . ?
Fe2 Fe1 S3 C10 107.46(13) . . . . ?
C4 Fe1 S3 Fe2 -152.81(10) . . . . ?
C5 Fe1 S3 Fe2 18.6(3) . . . . ?
N20 Fe1 S3 Fe2 107.95(6) . . . . ?
S4 Fe1 S3 Fe2 -52.07(3) . . . . ?
C2 Fe2 S3 C10 -130.9(3) . . . . ?
C1 Fe2 S3 C10 139.30(17) . . . . ?
C3 Fe2 S3 C10 44.05(18) . . . . ?
S4 Fe2 S3 C10 -55.20(12) . . . . ?
Fe1 Fe2 S3 C10 -105.99(12) . . . . ?
C2 Fe2 S3 Fe1 -24.9(3) . . . . ?
C1 Fe2 S3 Fe1 -114.71(12) . . . . ?
C3 Fe2 S3 Fe1 150.05(14) . . . . ?
S4 Fe2 S3 Fe1 50.79(3) . . . . ?
C4 Fe1 S4 C12 43.43(17) . . . . ?
C5 Fe1 S4 C12 142.01(18) . . . . ?
N20 Fe1 S4 C12 -128.1(2) . . . . ?
S3 Fe1 S4 C12 -55.06(15) . . . . ?
Fe2 Fe1 S4 C12 -106.53(16) . . . . ?
C4 Fe1 S4 Fe2 149.96(10) . . . . ?
C5 Fe1 S4 Fe2 -111.46(10) . . . . ?
N20 Fe1 S4 Fe2 -21.5(2) . . . . ?
S3 Fe1 S4 Fe2 51.47(2) . . . . ?
C2 Fe2 S4 C12 -156.7(2) . . . . ?
C1 Fe2 S4 C12 112.8(4) . . . . ?
C3 Fe2 S4 C12 -53.44(18) . . . . ?
S3 Fe2 S4 C12 54.54(15) . . . . ?
Fe1 Fe2 S4 C12 105.86(15) . . . . ?
```

Supplementary Material (ESI) for Chemical Communications  
This journal is (c) The Royal Society of Chemistry 2006

C2 Fe2 S4 Fe1 97.44(17) . . . . ?  
C1 Fe2 S4 Fe1 7.0(3) . . . . ?  
C3 Fe2 S4 Fe1 -159.30(11) . . . . ?  
S3 Fe2 S4 Fe1 -51.31(3) . . . . ?  
Fe1 S3 C10 C11 -60.4(4) . . . . ?  
Fe2 S3 C10 C11 15.3(4) . . . . ?  
S3 C10 C11 C12 51.4(6) . . . . ?  
C10 C11 C12 S4 -51.6(6) . . . . ?  
Fe1 S4 C12 C11 60.5(4) . . . . ?  
Fe2 S4 C12 C11 -14.7(4) . . . . ?  
C2 Fe2 C1 O1 150(9) . . . . ?  
C3 Fe2 C1 O1 46(9) . . . . ?  
S3 Fe2 C1 O1 -63(9) . . . . ?  
S4 Fe2 C1 O1 -120(9) . . . . ?  
Fe1 Fe2 C1 O1 -114(9) . . . . ?  
C1 Fe2 C2 O2 38(10) . . . . ?  
C3 Fe2 C2 O2 135(10) . . . . ?  
S3 Fe2 C2 O2 -50(10) . . . . ?  
S4 Fe2 C2 O2 -125(10) . . . . ?  
Fe1 Fe2 C2 O2 -70(10) . . . . ?  
C2 Fe2 C3 O3 -79(16) . . . . ?  
C1 Fe2 C3 O3 15(16) . . . . ?  
S3 Fe2 C3 O3 104(16) . . . . ?  
S4 Fe2 C3 O3 -169(16) . . . . ?  
Fe1 Fe2 C3 O3 157(16) . . . . ?  
C5 Fe1 C4 O4 -117(3) . . . . ?  
N20 Fe1 C4 O4 150(3) . . . . ?  
S4 Fe1 C4 O4 -27(3) . . . . ?  
S3 Fe1 C4 O4 60(3) . . . . ?  
Fe2 Fe1 C4 O4 20(3) . . . . ?  
C4 Fe1 C5 O5 71(11) . . . . ?  
N20 Fe1 C5 O5 171(11) . . . . ?  
S4 Fe1 C5 O5 -30(11) . . . . ?  
S3 Fe1 C5 O5 -100(10) . . . . ?  
Fe2 Fe1 C5 O5 -84(11) . . . . ?  
C4 Fe1 N20 C21 23.5(2) . . . . ?  
C5 Fe1 N20 C21 -75.5(2) . . . . ?  
S4 Fe1 N20 C21 -164.97(17) . . . . ?  
S3 Fe1 N20 C21 122.6(2) . . . . ?  
Fe2 Fe1 N20 C21 176.68(19) . . . . ?  
Fe1 N20 C21 C22 178.2(2) . . . . ?  
N20 C21 C22 C23 177.0(3) . . . . ?

\_diffn\_measured\_fraction\_theta\_max 0.857  
\_diffn\_reflns\_theta\_full 33.07  
\_diffn\_measured\_fraction\_theta\_full 0.857  
\_refine\_diff\_density\_max 0.781  
\_refine\_diff\_density\_min -0.635  
\_refine\_diff\_density\_rms 0.087

Supplementary Material (ESI) for Chemical Communications  
This journal is (c) The Royal Society of Chemistry 2006
